# Supplementary material for: Valproic Acid as a Potential Inhibitor of Plasmodium falciparum Histone Deacetylase 1 (PfHDAC1): An in Silico Approach
Source: MDPI journal article supplement (doi:10.3390/ijms16023915), 2015-02-11
Supplement: s1 [file s1]

# Supplementary Information

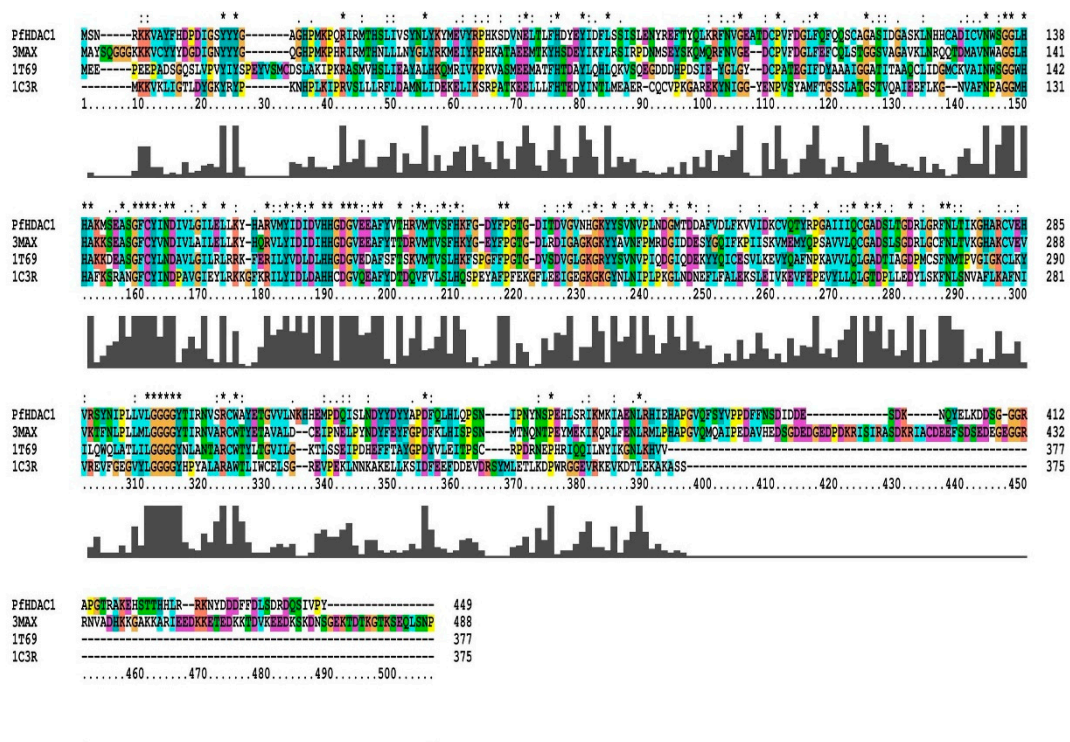

**Figure S1.** Multiple sequence alignment of *Pf*HDAC-1 with the templates selected to build the homology model in this study (3MAX) and previous studies (1T69 and 1C3R). Color codes as in ClustalX [26].

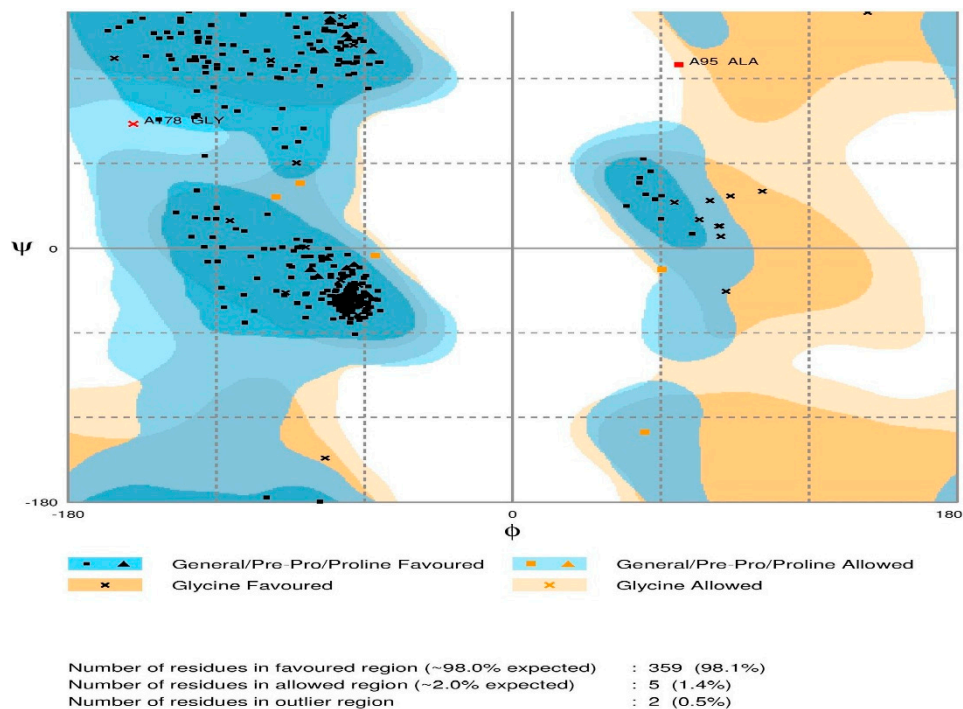

**Figure S2.** Ramachandran plot of  $(\phi, \psi)$  dihedral angles distribution for *Pf*HDAC-1 residues.

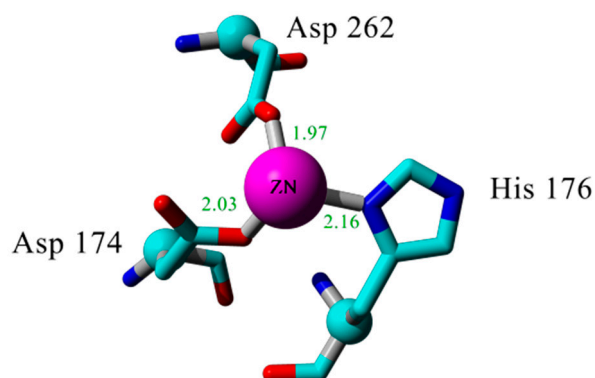

**Figure S3.** Zinc coordination in ligand free *Pf*HDAC-1, coordination distances in Å are shown in green.

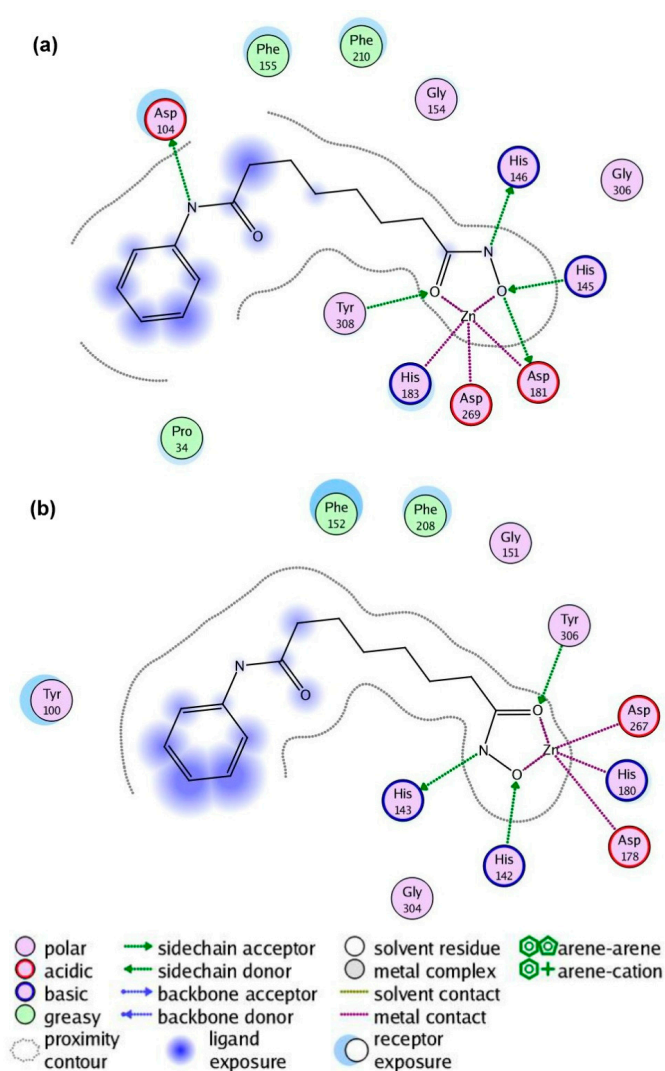

**Figure S4.** Hydroxamate derivative interaction in solved structures of HDAC homologues. (a) SAHA interactions in crystal structure of T311M HDAC8 (PDB: 4QA0) [55]; and (b) SAHA interactions in crystal structure of human HDAC (PDB: 4LXZ) [56].
